# Supplementary material
Source: PubMed Central journal article supplement (PMC4909623)
Supplement: aasm.39.7.1411s1.pdf [file aasm.39.7.1411s1.pdf]

**Table S1** Odds ratios (95% confidence interval) of very short, short and long sleep duration (versus normal) and mean differences (95% confidence interval) in sleep duration associated with psychosocial stress in the subsample with depressive symptoms data, The Jackson Heart Study, 2000-2004

|                | Model 1 <sup>a</sup>              |                                   |                                   |                                      | Model 2 <sup>a</sup>              |                                   |                                   |                                      | Model 3 <sup>a</sup>              |                                   |                                   |                                      |
|----------------|-----------------------------------|-----------------------------------|-----------------------------------|--------------------------------------|-----------------------------------|-----------------------------------|-----------------------------------|--------------------------------------|-----------------------------------|-----------------------------------|-----------------------------------|--------------------------------------|
|                | OR of very short sleep            | OR of short sleep                 | OR of long sleep                  | Mean difference in min of sleep      | OR of very short sleep            | OR of short sleep                 | OR of long sleep                  | Mean difference in min of sleep      | OR of very short sleep            | OR of short sleep                 | OR of long sleep                  | Mean difference in min of sleep      |
| <b>GPSS</b>    |                                   |                                   |                                   |                                      |                                   |                                   |                                   |                                      |                                   |                                   |                                   |                                      |
| Q1             | REF                               | REF                               | REF                               | REF                                  | REF                               | REF                               | REF                               | REF                                  | REF                               | REF                               | REF                               | REF                                  |
| Q2             | 1.06<br>(0.67, 1.66)              | 1.41<br>(1.11, 1.79) <sup>a</sup> | 0.88<br>(0.54, 1.43)              | -11.0<br>(-20.6, -1.4) <sup>a</sup>  | 0.91<br>(0.57, 1.46)              | 1.37<br>(1.07, 1.76) <sup>a</sup> | 0.92<br>(0.55, 1.54)              | -7.3<br>(-17.2, 2.6)                 | 0.82<br>(0.51, 1.32)              | 1.32<br>(1.03, 1.70) <sup>b</sup> | 0.87<br>(0.52, 1.45)              | -5.2<br>(-15.0, 4.7)                 |
| Q3             | 1.20<br>(0.74, 1.95)              | 1.54<br>(1.19, 1.99) <sup>a</sup> | 0.87<br>(0.50, 1.50)              | -19.0<br>(-29.4, -8.6) <sup>a</sup>  | 1.16<br>(0.70, 1.90)              | 1.52<br>(1.16, 2.00) <sup>a</sup> | 0.87<br>(0.48, 1.56)              | -18.0<br>(-28.7, -7.2) <sup>a</sup>  | 0.94<br>(0.56, 1.56)              | 1.43<br>(1.09, 1.87) <sup>a</sup> | 0.75<br>(0.42, 1.36)              | -13.9<br>(-24.7, -3.1) <sup>a</sup>  |
| Q4             | 2.80<br>(1.84, 4.26) <sup>a</sup> | 2.05<br>(1.59, 2.64) <sup>a</sup> | 0.89<br>(0.52, 1.52)              | -38.3<br>(-48.2, -28.4) <sup>a</sup> | 2.52<br>(1.63, 3.90) <sup>a</sup> | 1.94<br>(1.49, 2.53) <sup>a</sup> | 0.94<br>(0.53, 1.65)              | -33.9<br>(-44.1, -23.6) <sup>a</sup> | 1.63<br>(1.03, 1.87) <sup>b</sup> | 1.70<br>(1.29, 2.24) <sup>a</sup> | 0.72<br>(0.40, 1.30)              | -25.2<br>(-35.8, -14.6) <sup>a</sup> |
| <b>P-trend</b> | <0.01                             | <0.01                             | 0.67                              | <0.01                                | <0.01                             | <0.01                             | 0.76                              | <0.01                                | 0.01                              | <0.01                             | 0.24                              | <0.01                                |
| <b>MLE</b>     |                                   |                                   |                                   |                                      |                                   |                                   |                                   |                                      |                                   |                                   |                                   |                                      |
| Q1             | REF                               | REF                               | REF                               | REF                                  | REF                               | REF                               | REF                               | REF                                  | REF                               | REF                               | REF                               | REF                                  |
| Q2             | 1.54<br>(1.02, 2.34) <sup>b</sup> | 1.20<br>(0.96, 1.49) <sup>c</sup> | 0.63<br>(0.38, 1.03) <sup>c</sup> | -14.4<br>(-23.2, -5.6) <sup>a</sup>  | 1.74<br>(1.12, 2.70) <sup>a</sup> | 1.18<br>(0.94, 1.49)              | 0.61<br>(0.36, 1.03) <sup>c</sup> | -15.8<br>(-24.9, -6.7) <sup>a</sup>  | 1.71<br>(1.09, 2.66)              | 1.18<br>(0.94, 1.48) <sup>c</sup> | 0.61<br>(0.36, 1.02) <sup>c</sup> | -15.2<br>(-24.2, -6.2) <sup>a</sup>  |
| Q3             | 1.74<br>(1.14, 2.67) <sup>a</sup> | 1.27<br>(1.01, 1.59) <sup>b</sup> | 0.75<br>(0.45, 1.24)              | -18.6<br>(-27.8, -9.4) <sup>a</sup>  | 1.78<br>(1.13, 2.81) <sup>a</sup> | 1.28<br>(1.01, 1.62) <sup>b</sup> | 0.72<br>(0.42, 1.22)              | -18.6<br>(-28.0, -9.1) <sup>a</sup>  | 1.65<br>(1.04, 2.61)              | 1.24<br>(0.98, 1.57) <sup>b</sup> | 0.69<br>(0.40, 1.17)              | -16.5<br>(-25.9, -7.2) <sup>a</sup>  |
| Q4             | 3.51<br>(2.24, 5.50) <sup>a</sup> | 1.72<br>(1.31, 2.27) <sup>a</sup> | 1.50<br>(0.89, 2.53)              | -28.1<br>(-38.8, -17.5) <sup>a</sup> | 3.69<br>(2.30, 5.91) <sup>a</sup> | 1.57<br>(1.18, 2.10) <sup>a</sup> | 1.41<br>(0.82, 2.43)              | -28.4<br>(-39.4, -17.4) <sup>a</sup> | 3.01<br>(1.86, 4.87)              | 1.46<br>(1.09, 1.95) <sup>a</sup> | 1.28<br>(0.74, 2.22)              | -23.2<br>(-34.1, -12.2) <sup>a</sup> |
| <b>P-trend</b> | <0.01                             | <0.01                             | 0.30                              | <0.01                                | <0.01                             | <0.01                             | 0.44                              | <0.01                                | <0.01                             | <0.01                             | 0.64                              | <0.01                                |
| <b>WSI</b>     |                                   |                                   |                                   |                                      |                                   |                                   |                                   |                                      |                                   |                                   |                                   |                                      |
| Q1             | REF                               | REF                               | REF                               | REF                                  | REF                               | REF                               | REF                               | REF                                  | REF                               | REF                               | REF                               | REF                                  |
| Q2             | 1.14<br>(0.71, 1.84)              | 1.27<br>(1.00, 1.61) <sup>b</sup> | 1.24<br>(0.74, 2.07)              | -6.9<br>(-16.5, 2.8)                 | 1.09<br>(0.66, 1.81)              | 1.25<br>(0.97, 1.60) <sup>c</sup> | 1.38<br>(0.80, 2.39)              | -5.3<br>(-15.3, 4.6)                 | 0.99<br>(0.60, 1.65)              | 1.21<br>(0.94, 1.55)              | 1.31<br>(0.75, 2.26)              | -3.3<br>(-13.3, 6.6)                 |
| Q3             | 1.99<br>(1.28, 3.11) <sup>a</sup> | 1.59<br>(1.25, 2.02) <sup>a</sup> | 1.22<br>(0.71, 2.08)              | -20.8<br>(-30.5, -11.1) <sup>a</sup> | 2.04<br>(1.27, 3.25) <sup>a</sup> | 1.57<br>(1.22, 2.02) <sup>a</sup> | 1.27<br>(0.71, 2.28)              | -20.2<br>(-30.2, -10.1) <sup>a</sup> | 1.54<br>(0.96, 2.50) <sup>c</sup> | 1.43<br>(1.10, 1.85) <sup>a</sup> | 1.07<br>(0.59, 1.95)              | -14.1<br>(-24.4, -3.8) <sup>a</sup>  |
| Q4             | 3.40<br>(2.21, 5.25) <sup>a</sup> | 1.83<br>(1.42, 2.37) <sup>a</sup> | 1.51<br>(0.87, 2.60)              | -32.2<br>(-42.3, -22.1) <sup>a</sup> | 3.62<br>(2.30, 5.69) <sup>a</sup> | 1.76<br>(1.35, 2.29) <sup>a</sup> | 1.79<br>(1.01, 3.18) <sup>b</sup> | -30.6<br>(-41.0, -20.2) <sup>a</sup> | 2.06<br>(1.25, 3.40) <sup>a</sup> | 1.45<br>(1.09, 1.94) <sup>a</sup> | 1.27<br>(0.67, 2.40)              | -18.2<br>(-29.6, -6.9) <sup>a</sup>  |
| <b>P-trend</b> | <0.01                             | <0.01                             | 0.17                              | <0.01                                | <0.01                             | <0.01                             | 0.08                              | <0.01                                | <0.01                             | <0.01                             | 0.60                              | <0.01                                |

<sup>a</sup>P<0.01, <sup>b</sup>P<0.05, <sup>c</sup>P<0.10; Model 1 adjusted for age, sex, education, income; Model 2 adjusted for Model 1 + physical activity, body mass index, diabetes, and hypertension; Model 3 adjusted for Model 2 + depressive symptoms.

<sup>\*</sup>Sample size GPSS/MLE = 2,555; WSI = 2,734, <sup>+</sup>Sample size GPSS/MLE = 2,374; WSI = 2,531.

GPSS = Global Perceived Stress Scale; MLE = Major Life Events; OR = odds ratio; WSI = Weekly Stress Inventory.

**Table S2** Adjusted mean differences in sleep quality scores associated with psychosocial stress in the subsample with depressive symptoms data, The Jackson Heart Study, 2000-2004

|                | Mean difference in sleep quality                 |                                                  |                                                  |
|----------------|--------------------------------------------------|--------------------------------------------------|--------------------------------------------------|
|                | Model 1 <sup>*</sup><br>Mean difference (95% CI) | Model 2 <sup>+</sup><br>Mean difference (95% CI) | Model 3 <sup>^</sup><br>Mean difference (95% CI) |
| <b>GPSS</b>    |                                                  |                                                  |                                                  |
| Q1             | REF                                              | REF                                              | REF                                              |
| Q2             | -0.19 (-0.31, -0.07) <sup>a</sup>                | -0.19 (-0.31, -0.07) <sup>a</sup>                | -0.13 (-0.25, -0.02) <sup>b</sup>                |
| Q3             | -0.46 (-0.58, -0.33) <sup>a</sup>                | -0.46 (-0.59, -0.33) <sup>a</sup>                | -0.35 (-0.48, -0.22) <sup>a</sup>                |
| Q4             | -0.73 (-0.86, -0.61) <sup>a</sup>                | -0.74 (-0.87, -0.61) <sup>a</sup>                | -0.51 (-0.64, -0.38) <sup>a</sup>                |
| <b>P-trend</b> | <0.01                                            | <0.01                                            | <0.01                                            |
| <b>MLE</b>     |                                                  |                                                  |                                                  |
| Q1             | REF                                              | REF                                              | REF                                              |
| Q2             | -0.12 (-0.23, -0.01) <sup>b</sup>                | -0.13 (-0.25, -0.02) <sup>b</sup>                | -0.12 (-0.23, -0.01) <sup>b</sup>                |
| Q3             | -0.21 (-0.32, -0.09) <sup>a</sup>                | -0.24 (-0.35, -0.12) <sup>a</sup>                | -0.18 (-0.30, -0.07) <sup>a</sup>                |
| Q4             | -0.48 (-0.61, -0.35) <sup>a</sup>                | -0.49 (-0.62, -0.35) <sup>a</sup>                | -0.35 (-0.49, -0.22) <sup>a</sup>                |
| <b>P-trend</b> | <0.01                                            | <0.01                                            | <0.01                                            |
| <b>WSI</b>     |                                                  |                                                  |                                                  |
| Q1             | REF                                              | REF                                              | REF                                              |
| Q2             | -0.11 (-0.23, 0.01) <sup>c</sup>                 | -0.09 (-0.22, 0.03)                              | -0.03 (-0.16, 0.08)                              |
| Q3             | -0.31 (-0.43, -0.19) <sup>a</sup>                | -0.32 (-0.44, -0.19) <sup>a</sup>                | -0.14 (-0.26, -0.01) <sup>b</sup>                |
| Q4             | -0.53 (-0.65, -0.40) <sup>a</sup>                | -0.53 (-0.66, -0.40) <sup>a</sup>                | -0.16 (-0.30, -0.02) <sup>b</sup>                |
| <b>P-trend</b> | <0.01                                            | <0.01                                            | <0.01                                            |

<sup>a</sup>P<sub>≤</sub>0.01, <sup>b</sup>P<sub>≤</sub>0.05, <sup>c</sup>P<sub>≤</sub>0.10.

Model 1 adjusted for age, sex, education, income.

Model 2 adjusted for Model 1+ physical activity, body mass index, diabetes, and hypertension.

Model 3 adjusted for Model 2 + depressive symptoms.

\*Sample size GPSS/MLE = 2,555; WSI = 2,483.

<sup>+</sup>Sample size GPSS/MLE = 2,374; WSI = 2,310.

CI = confidence interval; GPSS = Global Perceived Stress Scale; MLE = Major Life Events; WSI = Weekly Stress Inventory.
